# Supplementary material for: Poldip2 controls leukocyte infiltration into the ischemic brain by regulating focal adhesion kinase-mediated VCAM-1 induction
Source: PubMed Central journal article supplement (PMC7970934; doi:10.1038/s41598-021-84987-z), 2021-03-10

# Poldip2 controls leukocyte infiltration into the ischemic brain by regulating focal adhesion kinase-mediated VCAM-1 induction

Lori N. Eidson <sup>1</sup>, Qingzeng Gao <sup>2</sup>, Hongyan Qu <sup>2</sup>, Daniel S. Kikuchi <sup>2</sup>, Ana Carolina P. Campos <sup>2,4</sup>, Elizabeth A. Faidley <sup>2</sup>, Yu-Yo Sun <sup>3</sup>, Chia-Yi Kuan <sup>3</sup>, Rosana L. Pagano <sup>4</sup>, Bernard Lassègue <sup>2</sup>, Malú G. Tansey <sup>1,5</sup>, Kathy K. Griendling <sup>2</sup>, & Marina S. Hernandez <sup>2\*</sup>

<sup>1</sup>Department of Physiology, Emory University, Atlanta GA 30322; <sup>2</sup>Division of Cardiology, Department of Medicine, Emory University, Atlanta GA 30322; <sup>3</sup>Department of Neuroscience, University of Virginia, Charlottesville, VA 22904; <sup>4</sup>Department of Neuroscience, Hospital Sírio-Libanês, São Paulo, Brazil; <sup>5</sup>Departments of Neuroscience and Neurology, Center for Translational Research in Neurodegenerative Disease, College of Medicine, Normal Fixel Institute for Neurological Diseases, University of Florida, Gainesville, FL 32610;

\* Corresponding author: mshern2@emory.edu

## Supplemental Figure 1

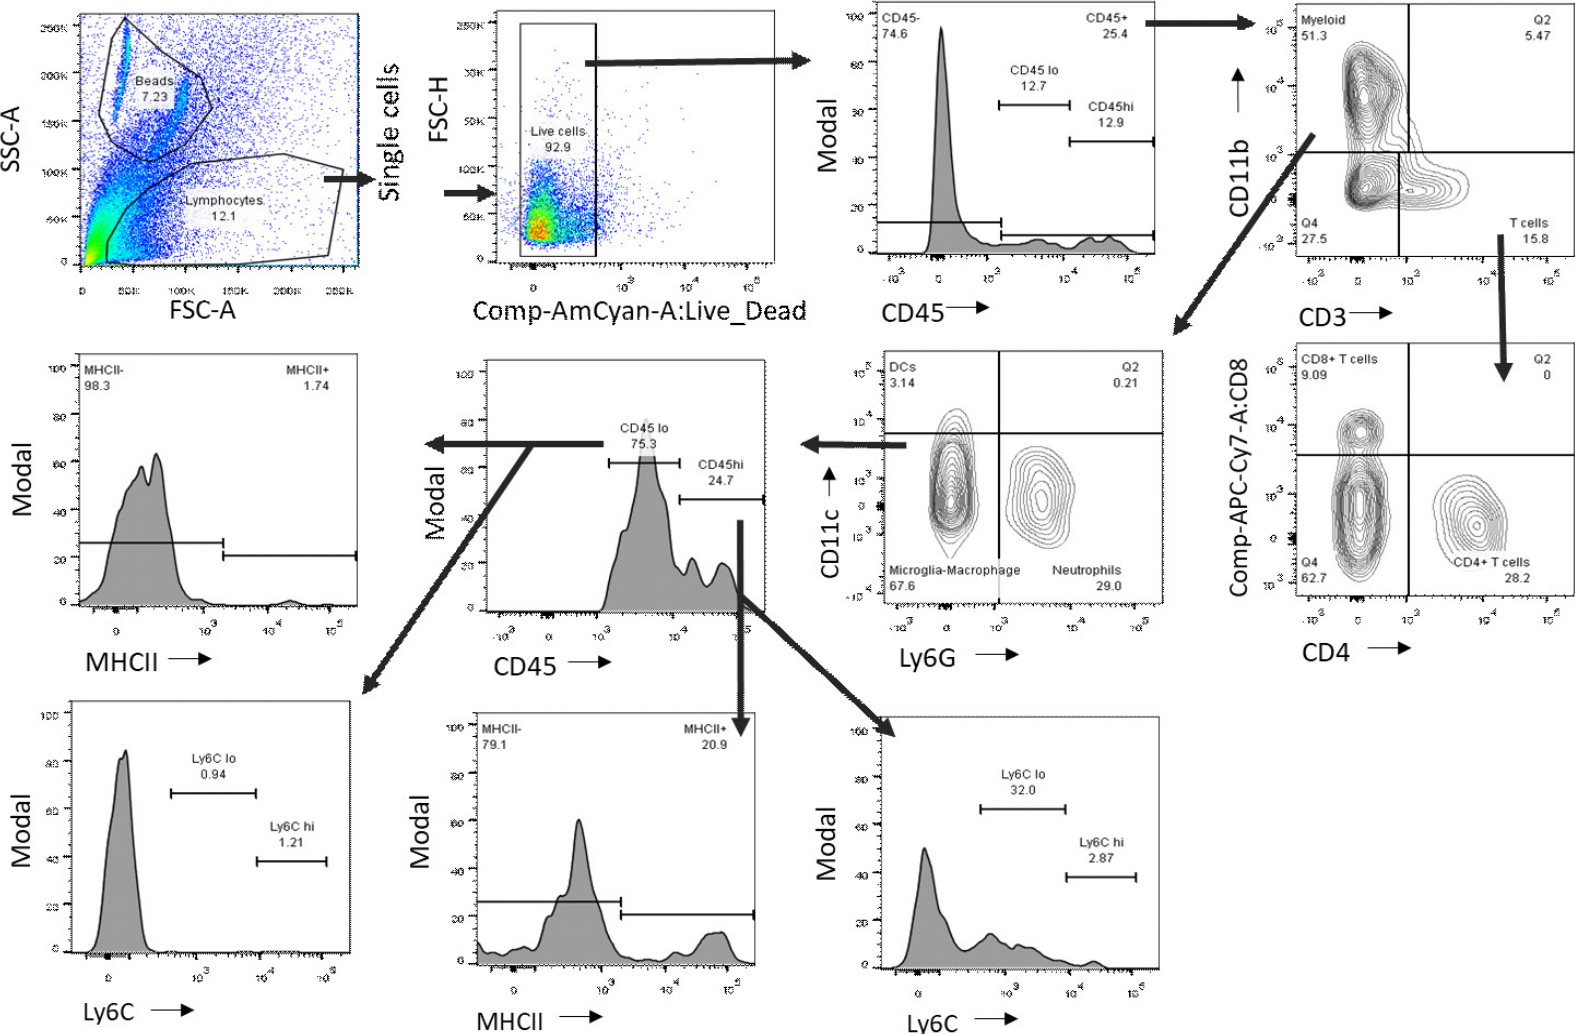

# Supplemental Figure 2

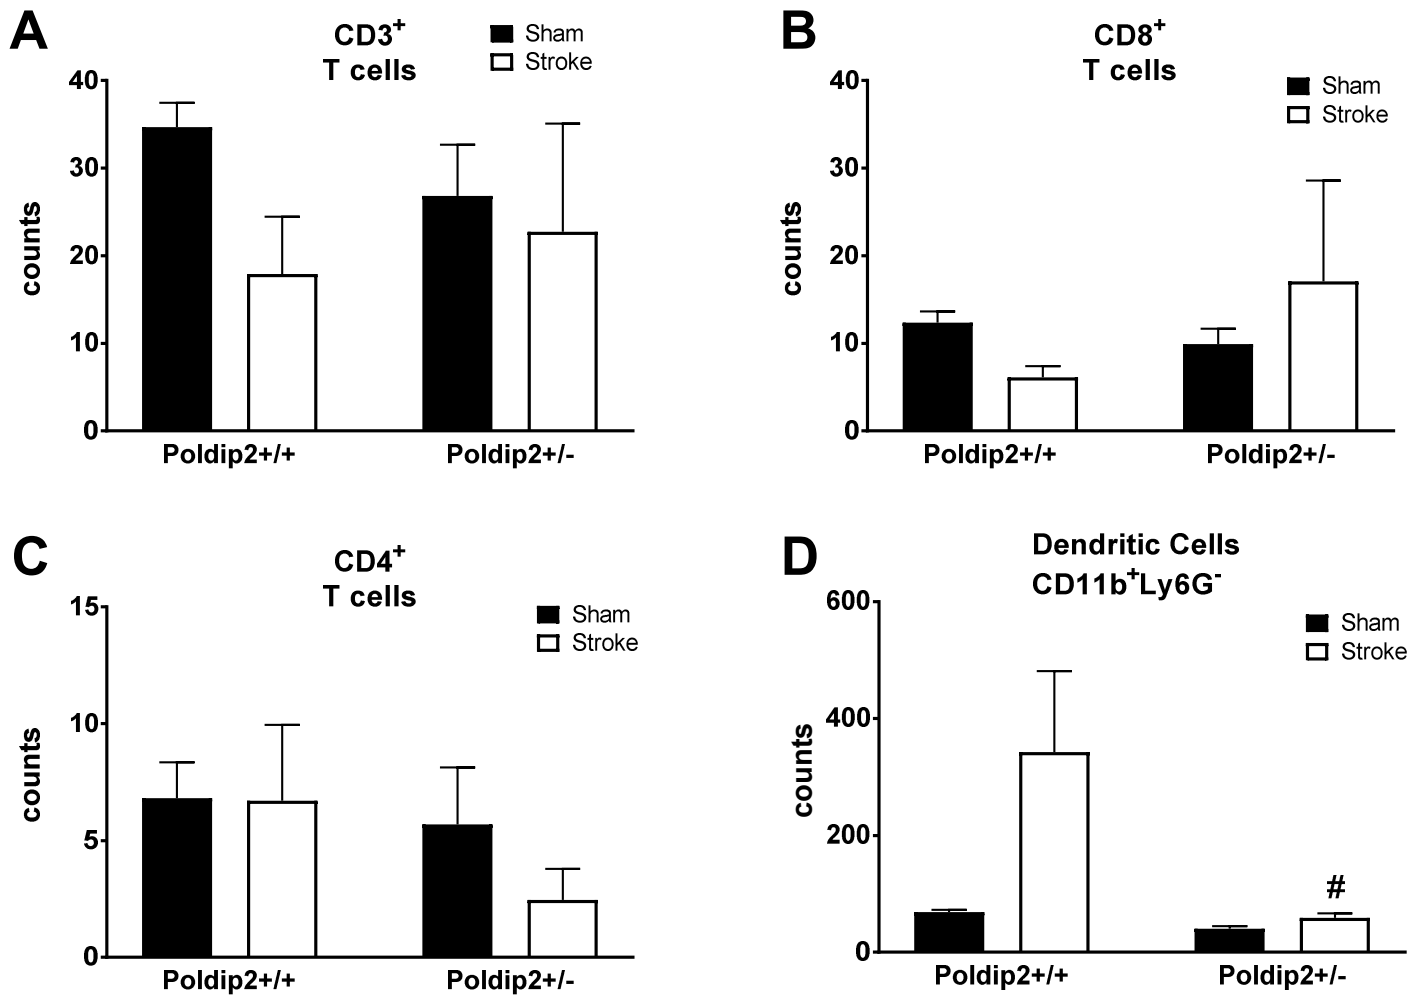

# Supplemental Figure 3

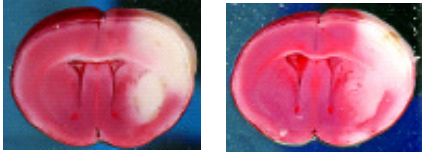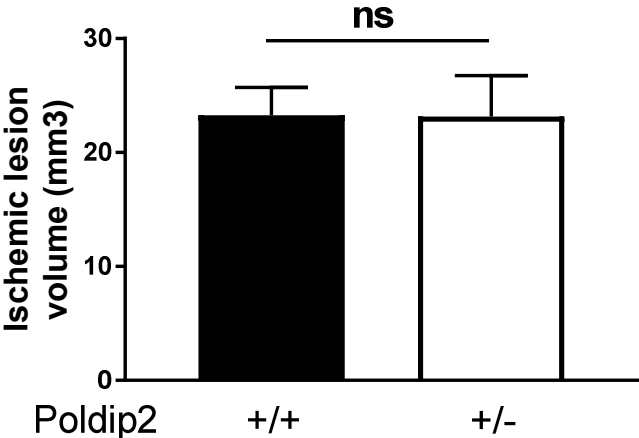

# Supplemental Figure 4

(original western blots for Figure 3)

**A**

siControl      siPoldip2  
PBS   TNF    PBS   TNF

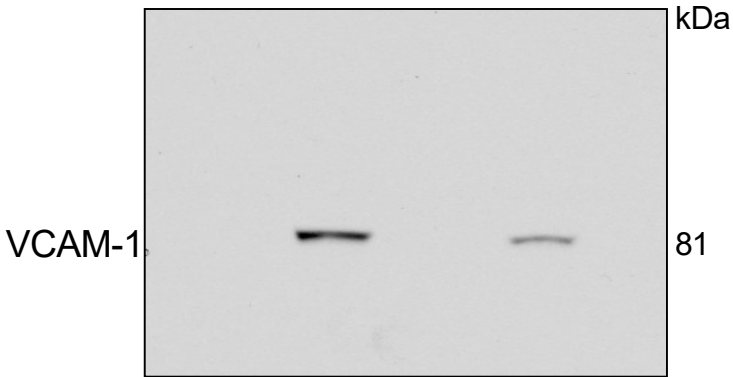

siControl      siPoldip2  
PBS   TNF    PBS   TNF

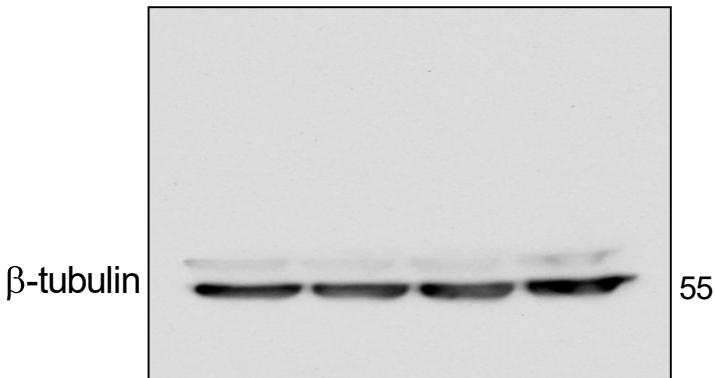

siControl      siPoldip2  
PBS   TNF    PBS   TNF

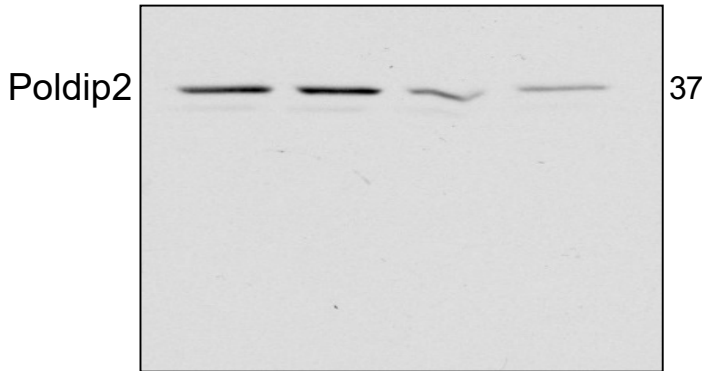

**D**

siControl      siVCAM-1  
PBS   TNF    PBS   TNF

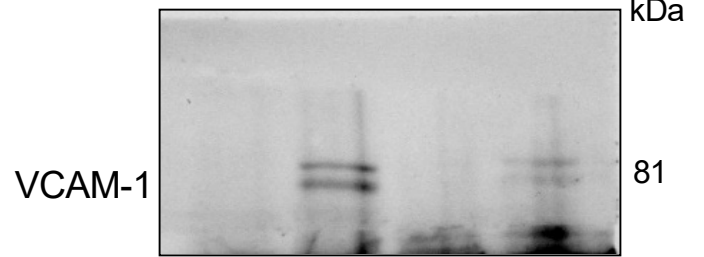

siControl      siVCAM-1  
PBS   TNF    PBS   TNF

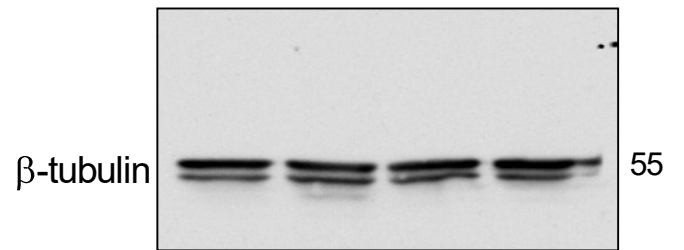

# Supplemental Figure 5

(original western blots for Figure 4)

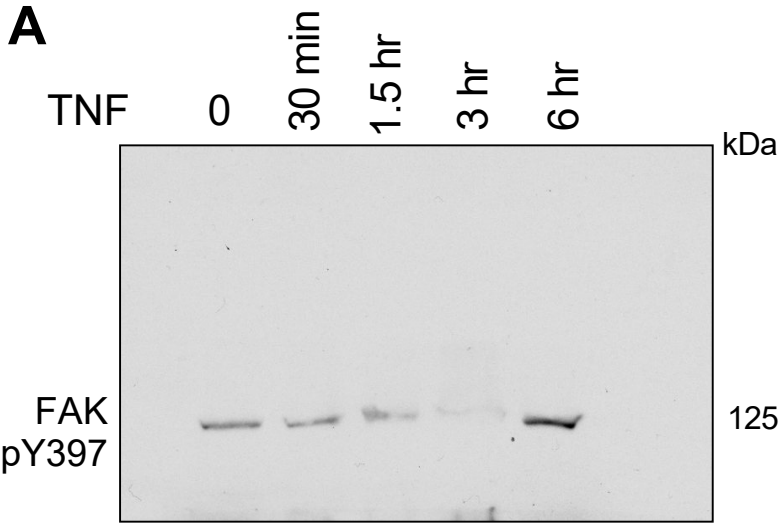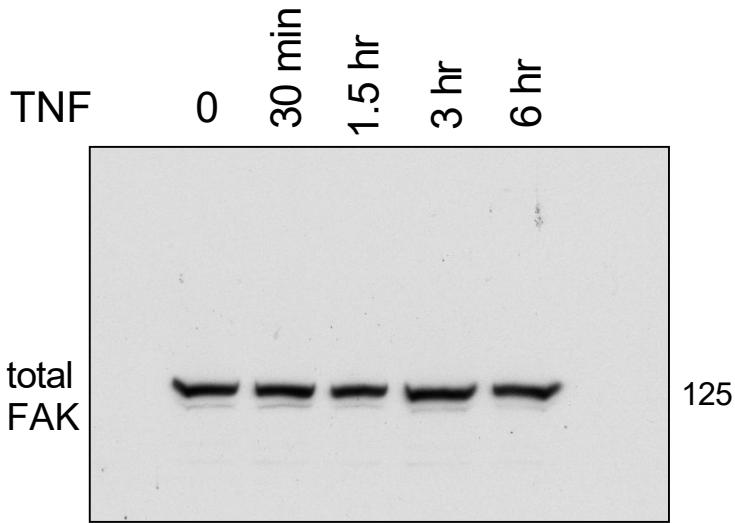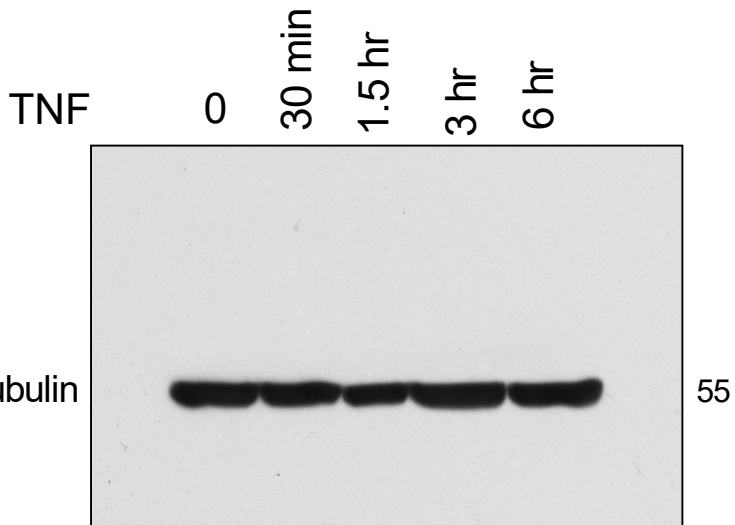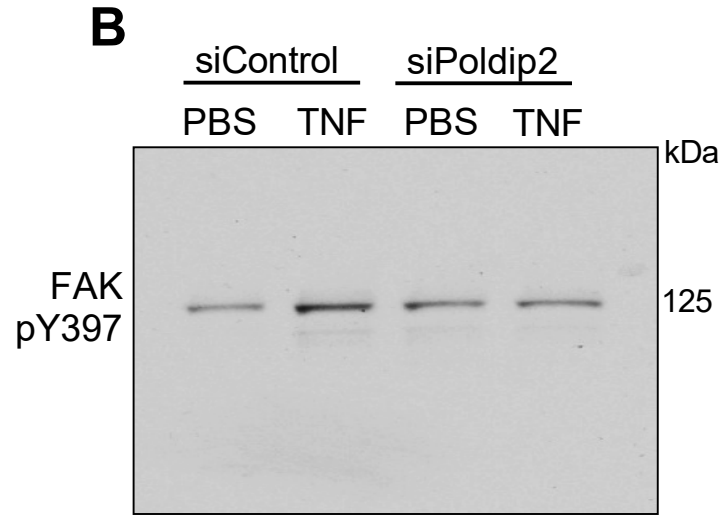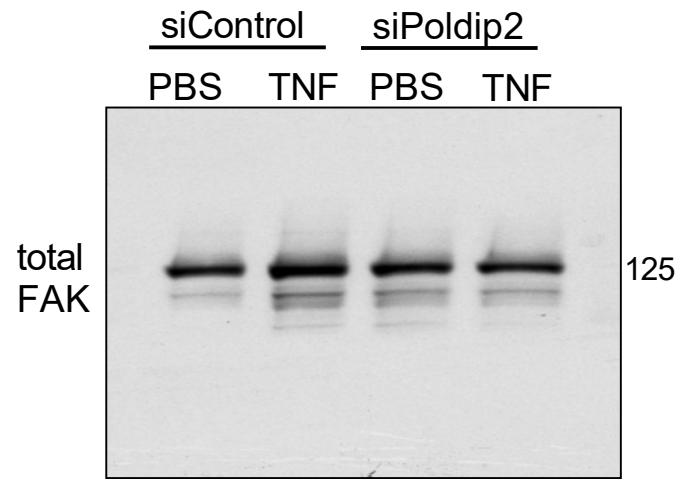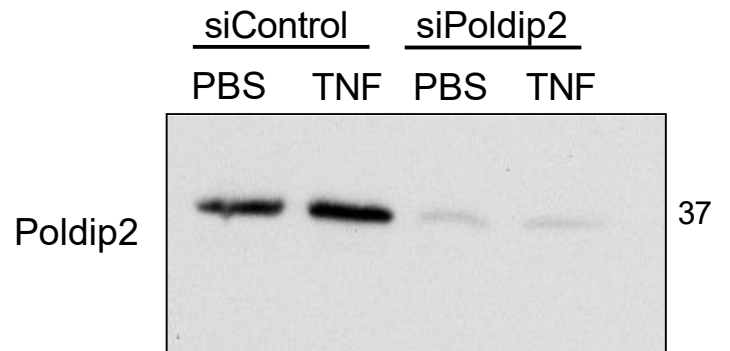

# Supplemental Figure 6

(original western blots for Figure 5)

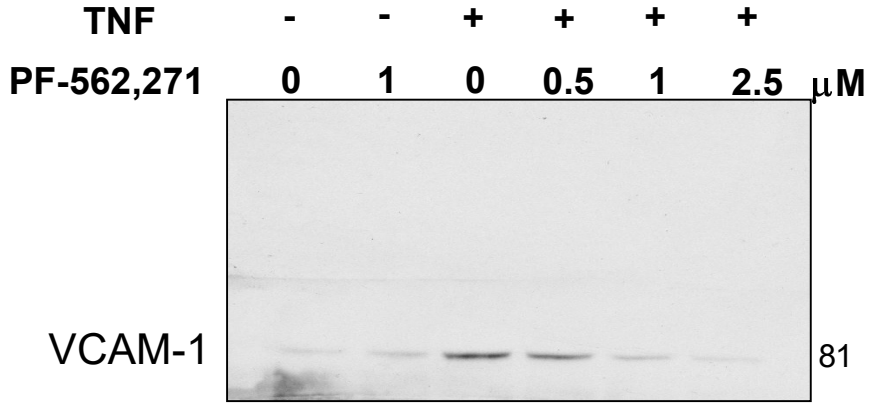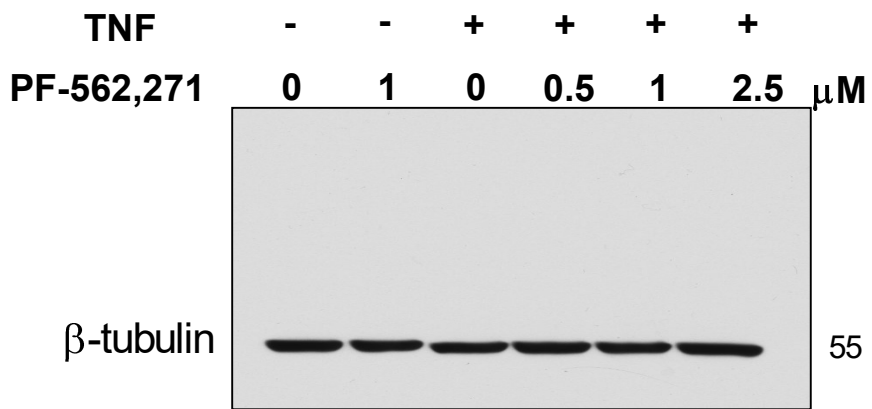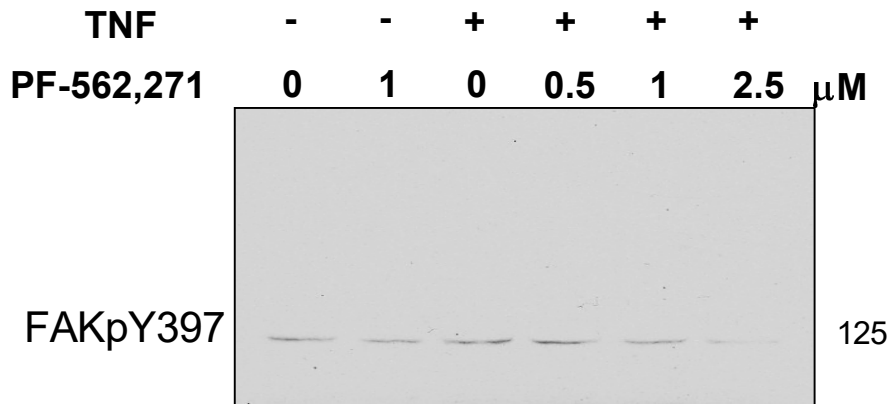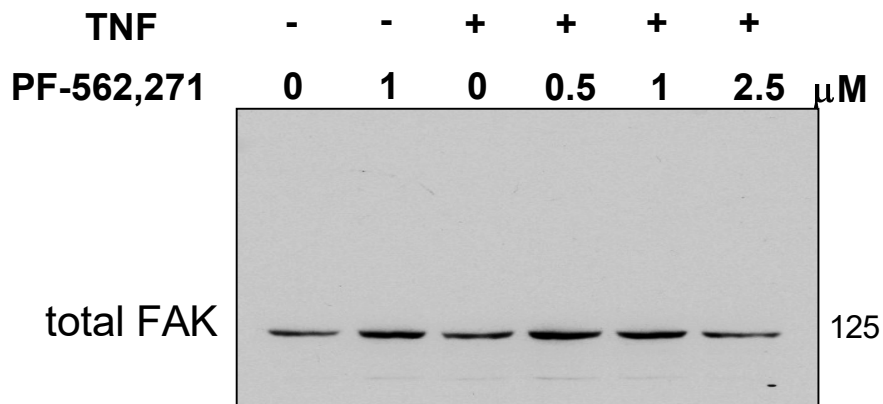

# Supplemental Figure 7

(original western blots for Figure 6)

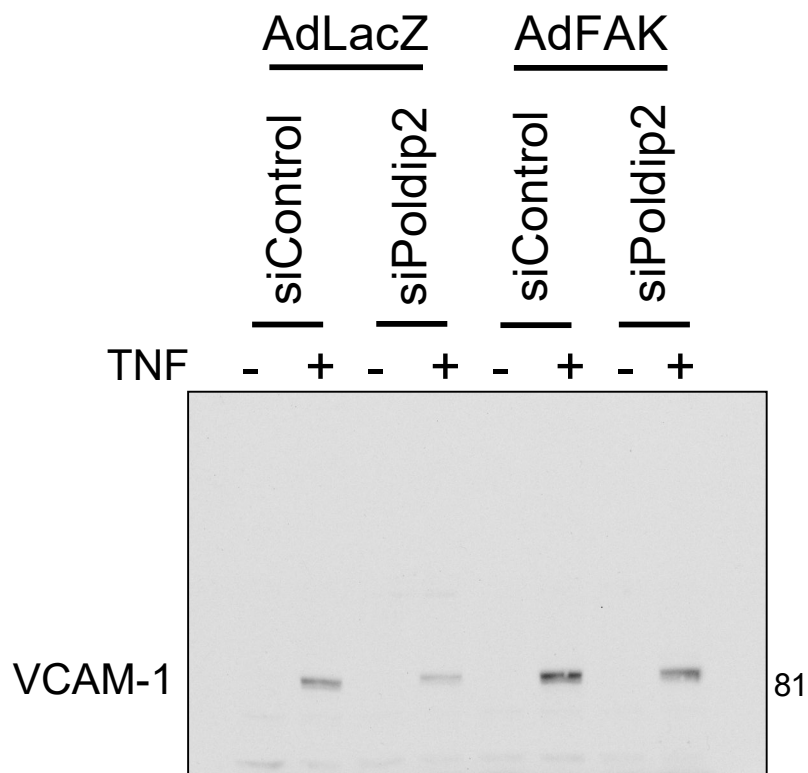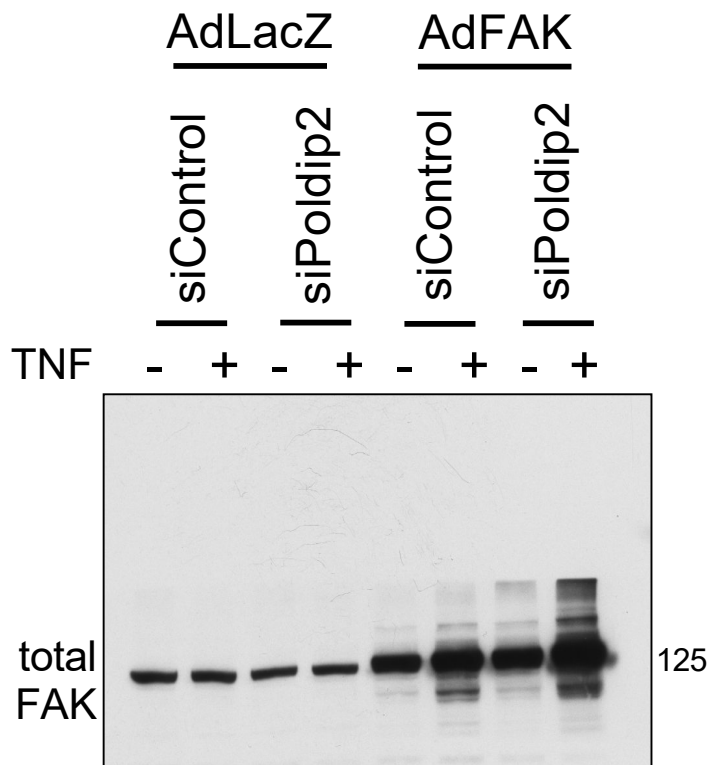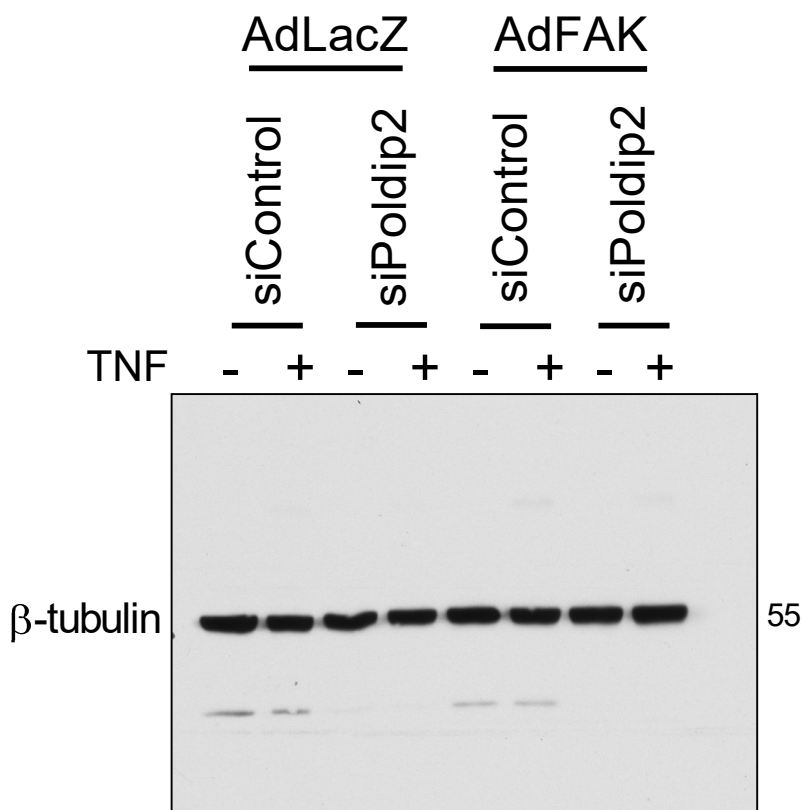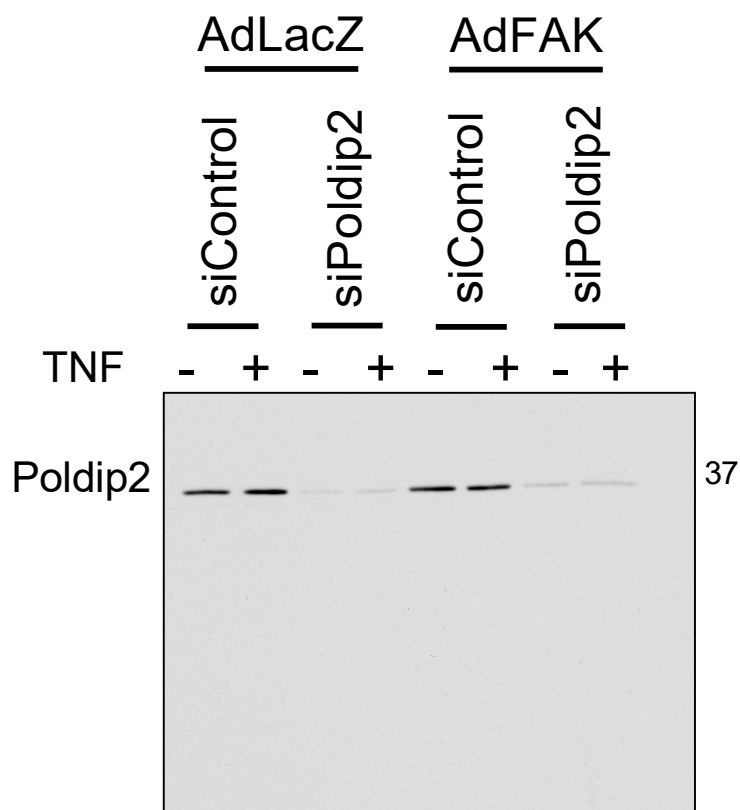

Supplement: 41598_2021_84987_MOESM1_ESM.pdf [file 41598_2021_84987_MOESM1_ESM.pdf]
